# Supplementary material for: Evaluating fixed-film nitrification systems in autotrophic mode: enhanced biomass retention does not improve bioreactor performance during alkalinity induced stress
Source: Royal Society of Chemistry journal article supplement (doi:10.1039/d1ew00612f), 2021-12-10
Supplement: d1ew00612f1.pdf [file d1ew00612f1.pdf]

Electronic Supplementary Information

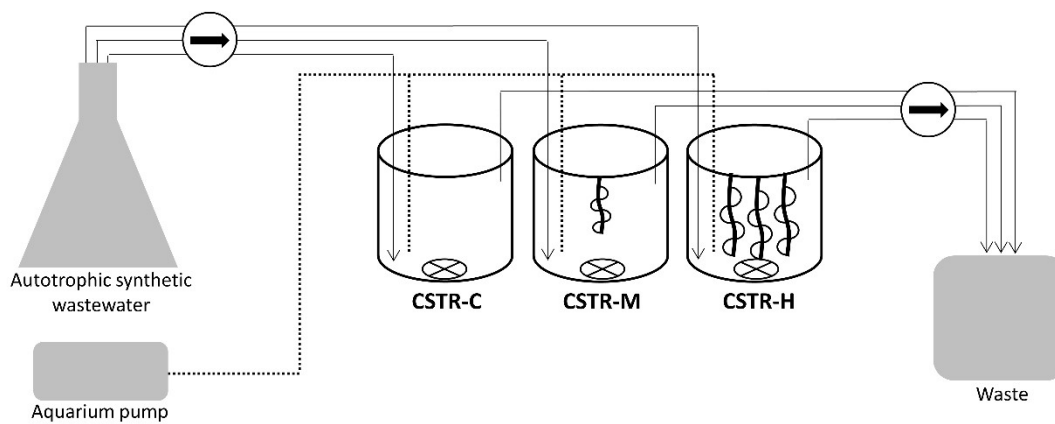

**Fig. S1:** Schematic diagram of the experimental set-up. CSTR-C contained no BioCord™ and was considered to be a control reactor, whereas CSTR-M and CSTR-H contained different lengths of BioCord™ to achieve medium and high surface area to volume ratios, respectively.

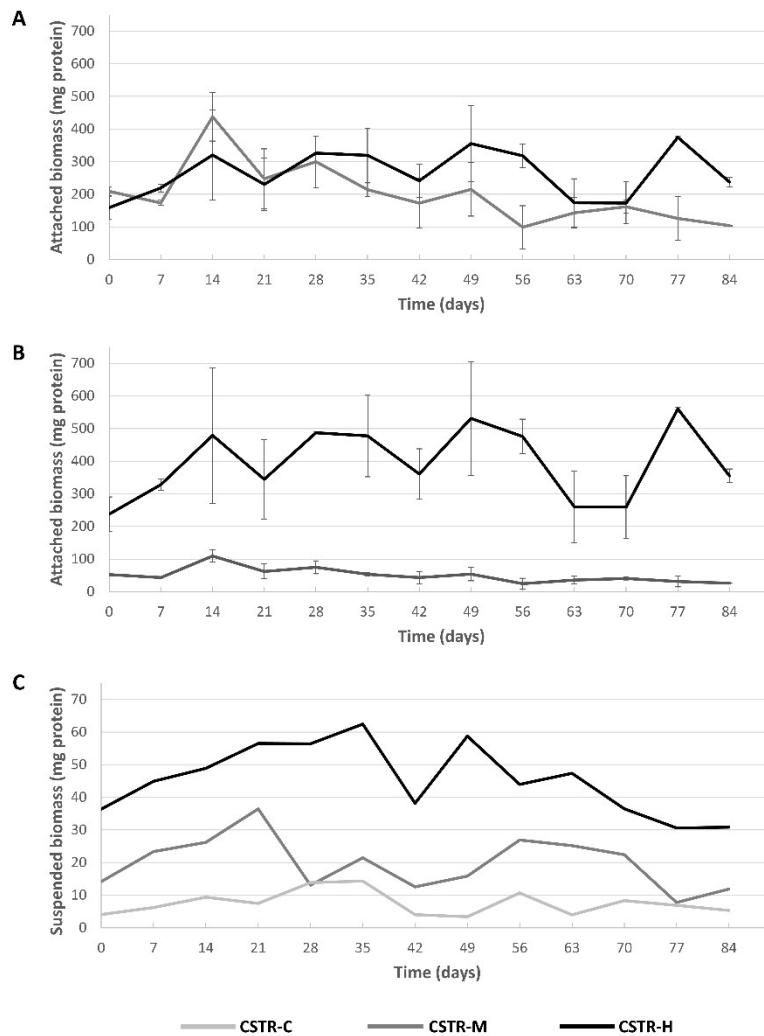

**Fig. S2:** Weekly quantification of attached and suspended biomass. **A:** Attached biomass per m<sup>2</sup> of BioCord™; **B:** Attached biomass extrapolated to total BioCord™ surface area; **C:** Suspended biomass extrapolated to bioreactor working volume. Data points in A and B represent the average and standard deviation of four BCA reactions (two reactions per sampled BioCord™ loop), while data points in C are the average of two BCA reactions performed on the bulk liquid.
